# Supplementary material for: Biology and Targetability of the Extended Spectrum of PIK3CA Mutations Detected in Breast Carcinoma
Source: Oxford University Press journal article supplement (doi:10.1158/1078-0432.ccr-22-2115), 2022-11-02
Supplement: ccr-22-2115_supplementary_figure_8_suppfs8.pdf [file ccr-22-2115_supplementary_figure_8_suppfs8.pdf]

## Supplementary Figure 8

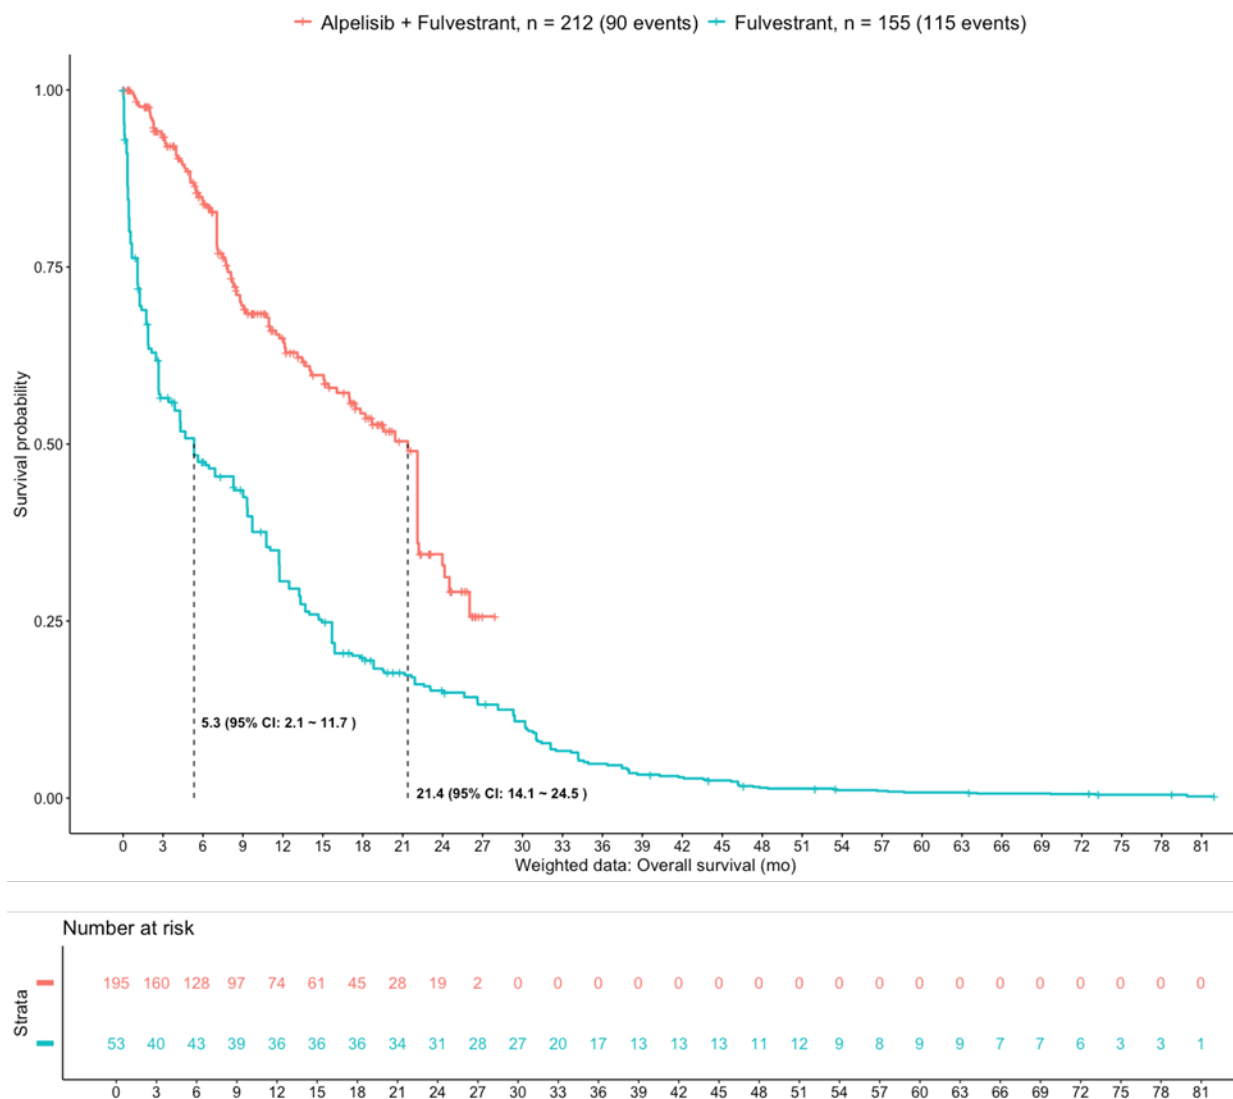

**Supplementary Figure 8. Overall survival among patients with *PIK3CA*-mutated HR+HER2- breast cancer treated with alpelisib/fulvestrant versus fulvestrant alone.**

Kaplan-Meier curves represent OS estimation based on real OS adjusted using IPTW method.
